# Supplementary material
Source: publisher figshare collection journal article supplement (https://acs.figshare.com/ndownloader/files/3916972)
Supplement: Supplementary file 1 [file 3916972]

# Supporting Information

## Ultrafast Molecule Separation through Layered WS<sub>2</sub> Nanosheet Membranes

*Luwei Sun,<sup>†</sup> Yulong Ying,<sup>†</sup> Hubiao Huang,<sup>†</sup> Zhigong Song,<sup>ξ</sup> Yiyin Mao,<sup>†</sup> Zhiping Xu<sup>ξ</sup> and  
Xinsheng Peng<sup>\*†‡</sup>*

<sup>†</sup> State Key Laboratory of Silicon Materials, Department of Materials Science and Engineering,  
Zhejiang University, Hangzhou 310027, China.

<sup>‡</sup> Cyrus Tang Centre for Sensor Materials and Applications, Zhejiang University, Hangzhou  
310027, China

<sup>ξ</sup> Applied Mechanics Laboratory, Department of Engineering Mechanics and Center for Nano and  
Micro Mechanics, Tsinghua University, Beijing 100084, China.

Figure S1

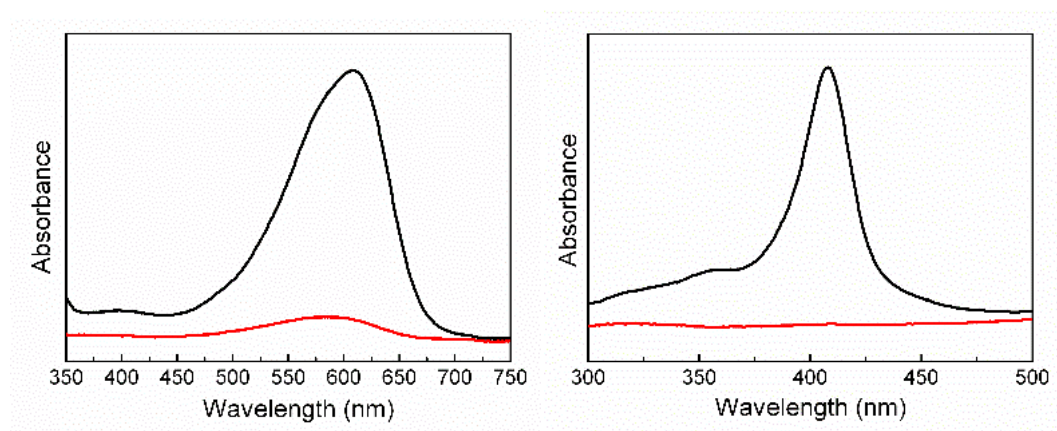

Figure S1 UV-*vis* spectra of EB (left) and Cyt. C (right) in original feed (black) and permeate (red) solutions, respectively.

Figure S2

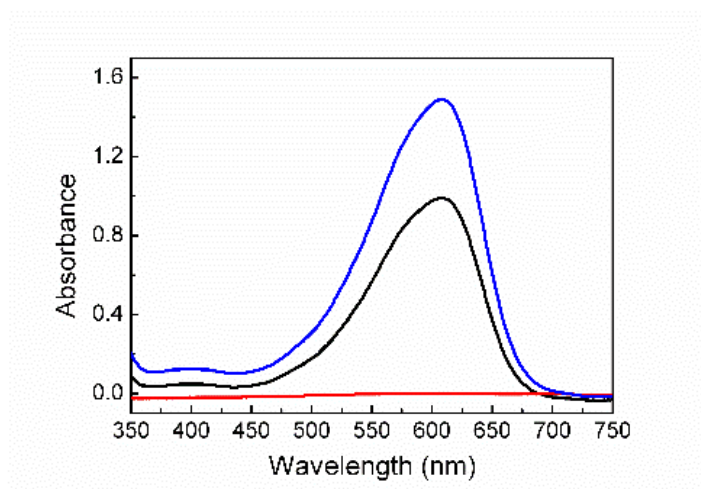

Figure S2 UV-*vis* spectra of EB in original feed (black), retentate (blue) and permeate (red) solution. Permeate and retentate solutions are collected in 120 minutes. This test aims at the separation mechanism in the WS2 membrane. Higher absorbance in retentate solution suggests that most EB molecules are blocked instead of being absorbed by the membrane.

Figure S3

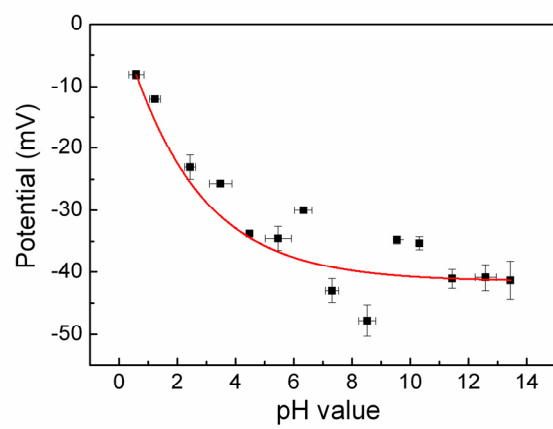

Figure S3 pH-dependent zeta potential of WS<sub>2</sub> aqueous solution.

Figure S4

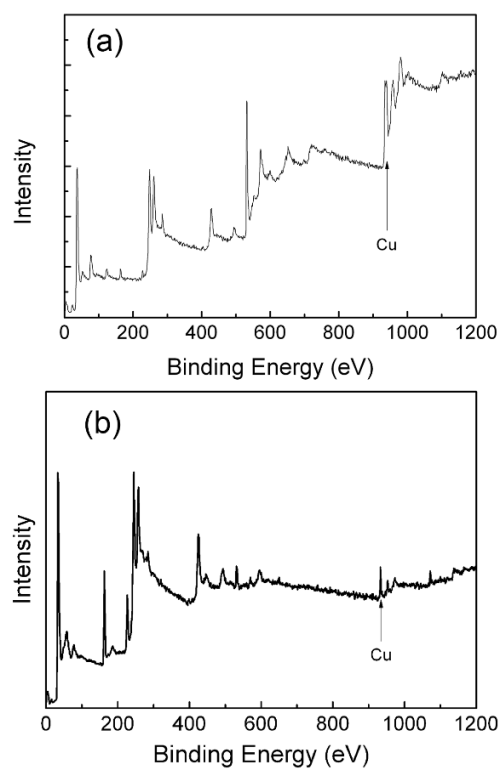

Figure S4 XPS spectra of WS<sub>2</sub>/copper hydroxide nanostrands composite membrane before (a) and after (b) removing copper hydroxide nanostrands.

Table S1 Comparison of separation performance of GO and MoS<sub>2</sub> membrane.

| Membrane                                                | Thickness<br>( $\mu\text{m}$ ) | Water Permeance<br>( $\text{L}/\text{m}^2\cdot\text{h}\cdot\text{bar}$ ) | Rejection %<br>(EB) | Reference |
|---------------------------------------------------------|--------------------------------|--------------------------------------------------------------------------|---------------------|-----------|
| GO                                                      | 2                              | 71                                                                       | 85                  | S1        |
| MoS <sub>2</sub>                                        | 1.8                            | 245                                                                      | 89                  | S2        |
| WS <sub>2</sub>                                         | 0.5                            | 450                                                                      | 89                  | This work |
| Nanostrands-channelled<br>GO                            | 2                              | 695                                                                      | 84                  | S3        |
| Nanostrands-channelled<br>WS <sub>2</sub>               | 0.5                            | 930                                                                      | 83                  | This work |
| Nanostrands-channelled<br>WS <sub>2</sub> after cracked | 0.5                            | 1850                                                                     | 82                  | This work |

References:

- S1. Huang, H. B.; Mao, Y. Y.; Ying, Y. L.; Liu, Y.; Sun, L. W.; Peng, X. S. Salt Concentration, pH and Pressure Controlled Separation of Small Molecules through Lamellar Graphene Oxide Membranes. *Chem. Commun.* **2013**, 49, 5963-5965.
- S2. Sun, L. W.; Huang, H. B.; Peng, X. S. Laminar MoS<sub>2</sub> Membranes for Molecule Separation. *Chem. Commun.* **2013**, 49, 10718-10720.
- S3. Huang, H. B.; Song, Z. G.; Wei, N.; Shi, L.; Mao, Y. Y.; Ying, Y. L.; Sun, L. W.; Xu, Z. P.; Peng, X. S. Ultrafast Viscous Water Flow through Nanostrand-Channeled Graphene Oxide Membranes. *Nat. Commun.* **2013**, 4, 3979.
